# Supplementary material
Source: PubMed Central journal article supplement (PMC5028310)
Supplement: NIHMS812005-supplement-1.pdf [file NIHMS812005-supplement-1.pdf]

Supplementary data

| Arm   | Construct | Sequence                                      |
|-------|-----------|-----------------------------------------------|
| Left  | piggyBac  | aagcgcaaatcttt <b>TTAA</b> CCCTAGAAAGATAATCA  |
|       | ET-Gal4   | gcttgtttgatcttt <b>TTAA</b> CCCTAGAAAGATAATCA |
| Right | piggyBac  | TATCTTTCTAGGG <b>TTAA</b> ataatagtttctaata    |
|       | ET-Gal4   | TATCTTTCTAGGG <b>TTAA</b> gggggcaggatccgt     |

Table S1. Inverse PCR analysis on ET-Gal4 driver strain indicated the integration of ET-Gal4 cassette in the *Ae. aegypti* genome.

---
