# Supplementary material
Source: PubMed Central journal article supplement (PMC5028310)
Supplement: NIHMS812005-supplement-2.pdf [file NIHMS812005-supplement-2.pdf]

Supplementary data

Gene (PCR)      Sequence 5'-3'

---

Actin

Forward                      AAGGCCAACCGTGAGAAGATGACT

Reverse                      GCTCGTTGCCAATGGTGATGAC

ET promoter (cloning)

Forward                      ATCCTAACTACATCGCTTCC

Reverse                      GGCTGTGGTTCAGGGTTATG

Gal4-SV40 fragment (cloning)

Forward                      AGCTTTGTTTAAACGCGAGCTTGAAGCAAGCCTC

Reverse                      CCGACTAGTATATATAGGGCCCGGGTTAT

ET-Gal4-SV40 fragment (Cloning)

Forward                      CTGGCGCGCCATCCTAACTACATCGCTTCC

Reverse                      CTGGCGCGCCATATATAGGGCCCGGGTTAT

ET-Gal4

Forward                      GAGACATTTCTGCGGAGGGT

Reverse                      GGCAAGAATCCTTACCTCCA

UAS-EGFP

Forward (UAS)              CAAGAAGAGAACTCTGAATAGGG

Reverse (158)              TGAAGTCGATGCCCTTCAGCT

piggyBac(Left Arm)

Forward (L1)              TGTC AATGCGGTAAGTGTC A

Reverse (L2)              CCTCTGTGGCAAGGTCAAGA

piggyBac(Right Arm)

Forward (R1)              TGATGACCTGCAGTAGGAAGACG

Reverse (R2)              AGAAACA A C T T T G G C A C A T A T C A

Inverse PCR (Left Arm)

574F                      TCTTGACCTTGCCACAGAGG

157R                      TGACACTTACCGCATTGACA

Inverse PCR (Right Arm)

2388F                      GTCAGTCCAGAAACA A C T T T G G C

2123R                      CCTCGATATACAGACCGATAAAAACACATG

| Gene (qRT-PCR)      | Sequence 5'-3'                             |
|---------------------|--------------------------------------------|
| <u><i>Actin</i></u> |                                            |
| Forward             | GACTACCTGATGAAGATCCTGAC                    |
| Reverse             | GCACAGCTTCTCCTTAATGTCAC                    |
| <u><i>ET</i></u>    |                                            |
| Forward             | ACCGTGGCAGATGGAGCTAT                       |
| Reverse             | CGCCTGGTTGTACGAAGGA                        |
| <u><i>Gal4</i></u>  |                                            |
| Forward             | TCAAATCATGTCAAGGTCTTCTCG                   |
| Reverse             | CAAAACCAAAGGTCTCCGCT                       |
| <u><i>EGFP</i></u>  |                                            |
| Forward             | CAGGGTGGTCACGAGGGTGG                       |
| Reverse             | GTGCCCATCCTGGTTCGAGCT                      |
| <u><i>Met</i></u>   |                                            |
| Forward             | GGACGACAGCTCAAAGAAGG                       |
| Reverse             | TCACCTTCATCGGGGAGTTC                       |
| Gene (dsRNA)        | Sequence 5'-3'                             |
| <u><i>dsLuc</i></u> |                                            |
| Forward             | TAATACGACTCACTATAGGGCTCTGCCTCATAGAACTGCCTG |
| Reverse             | TAATACGACTCACTATAGGGAACCTTCGCTTCAAAAAATGGA |
| <u><i>dsMet</i></u> |                                            |
| Forward             | TAATACGACTCACTATAGGGTCAATTTGTTCGACTCTGCG   |
| Reverse             | TAATACGACTCACTATAGGGATACACAAAGTCGCCCGTTC   |

Table S2. List of primers.
